# Supplementary material for: TiVNb-based high entropy alloys as catalysts for enhanced hydrogen storage in nanostructured MgH2
Source: Royal Society of Chemistry journal article supplement (doi:10.1039/d2ta08086a), 2023-01-01
Supplement: d2ta08086a1.pdf [file d2ta08086a1.pdf]

## Supplementary Information

### TiVNb-based high entropy alloys as catalysts for enhanced hydrogen storage in nanostructured MgH<sub>2</sub>

Jingxi Zhang<sup>a,b</sup>, Huang Liu<sup>b,c</sup>, Chengshang Zhou<sup>\*,b,c</sup>, Pei Sun<sup>\*,b</sup>, Xueyi Guo<sup>\*,a</sup>, Zhigang Zak Fang<sup>b</sup>

a School of Metallurgy and Environment, Central South University, Changsha, Hunan 410083, P.R. China

b Department of Materials Science and Engineering, The University of Utah, Salt Lake City, Utah 84112-0114, United States

c State Key Laboratory for Powder Metallurgy, Central South University, Changsha, Hunan 410083, P.R. China

\*Corresponding author

E-mail addresses: chengshang.zhou@utah.edu; pei.sun@utah.edu; xyguo@csu.edu.cn

For the HEAs, the empirical parameters of average atomic size mismatch ( $\delta$ ), valance electron concentration (VEC) and electronegativity differences ( $\Delta\chi_{Allen}$ ) are usually used to determine the phase structure formation and the stability<sup>1-3</sup>. These parameters can be determined using the following equations:

$$\delta = \sqrt{\sum c_i \left(1 - \frac{r_i}{\bar{r}}\right)^2} \times 100 \quad (1)$$

$$VEC = \sum c_i VEC_i \quad (2)$$

$$\Delta\chi_{Allen} = \sqrt{\sum_{i=1}^n c_i (\chi_i - \bar{\chi})^2} \bar{\chi} \quad (3)$$

where  $c_i$ ,  $r_i$ ,  $VEC_i$  and  $\chi_i$  stood for the atom fractions, the atomic radius, valence electron concentration and electronegativity of element  $i$ .  $\bar{r}$  and  $\bar{\chi}$  represented the average atomic radius and the average electronegativity of HEA. The physicochemical parameters essential for the estimation of the above parameters were obtained from the literature<sup>4 5</sup> and provided in Table S1.

Table S1 Atomic radius, electronegativities and VEC for selected of elements.

| Element | Atomic radius (Å) | Electronegativity | VEC |
|---------|-------------------|-------------------|-----|
| Ti      | 1.46              | 1.54              | 4   |
| V       | 1.32              | 1.63              | 5   |
| Nb      | 1.43              | 1.6               | 5   |
| Zr      | 1.6               | 1.33              | 4   |
| Fe      | 1.24              | 1.83              | 8   |
| Cr      | 1.25              | 1.66              | 6   |
| Ni      | 1.25              | 1.91              | 10  |

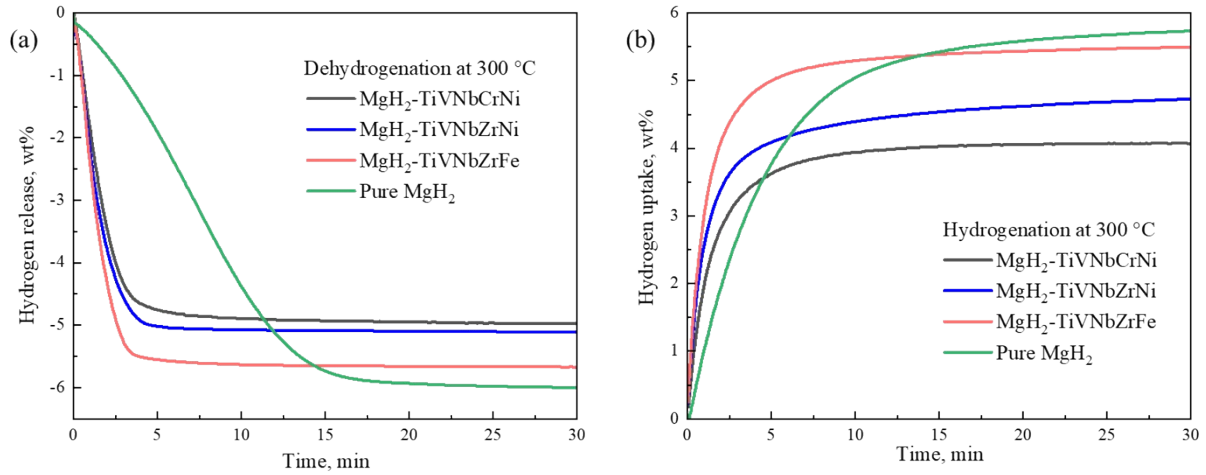

Figure S1 The isothermal dehydrogenation (a) and hydrogenation (b) curves of MgH<sub>2</sub>-HEAs and pure MgH<sub>2</sub> at 300°C.

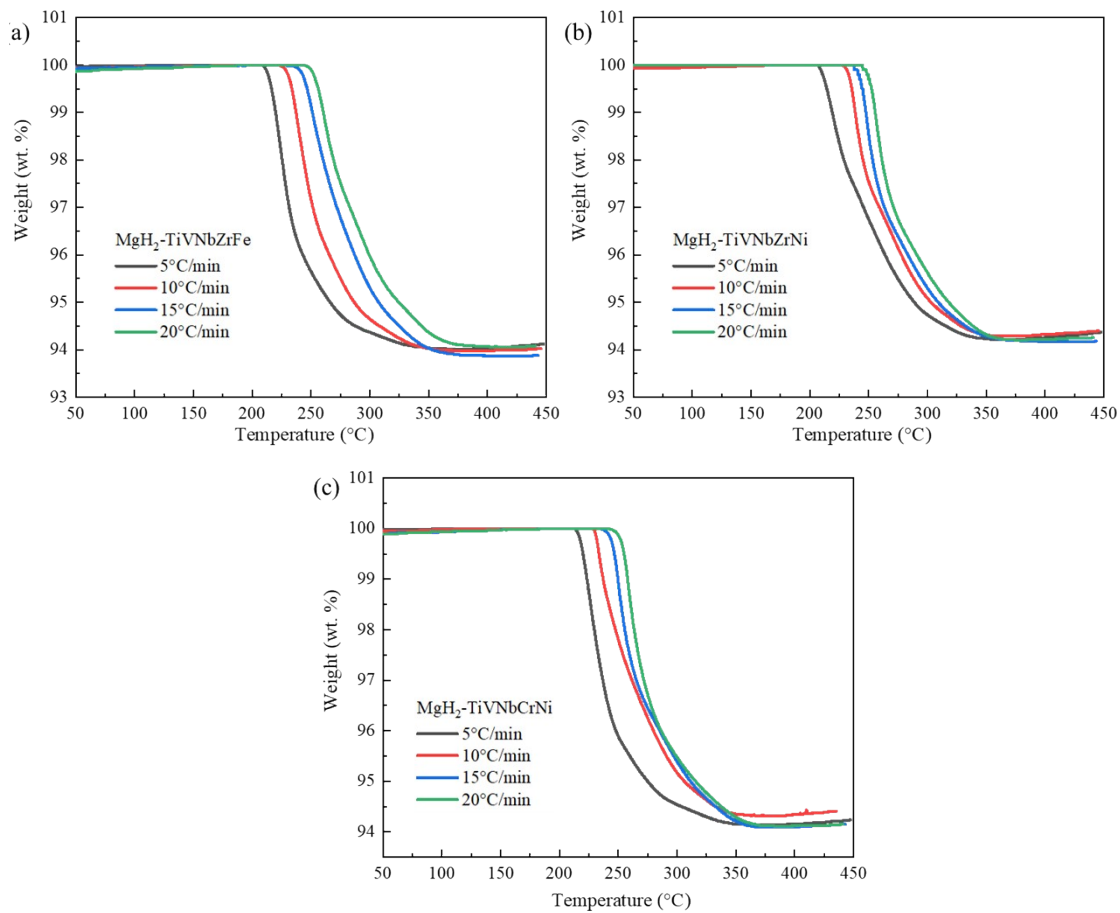

Figure S2 The TGA results for the (a) MgH<sub>2</sub>-TiVNbZrFe, (b) MgH<sub>2</sub>-TiVNbZrNi and (c) MgH<sub>2</sub>-TiVNbCrNi under various heating rates.

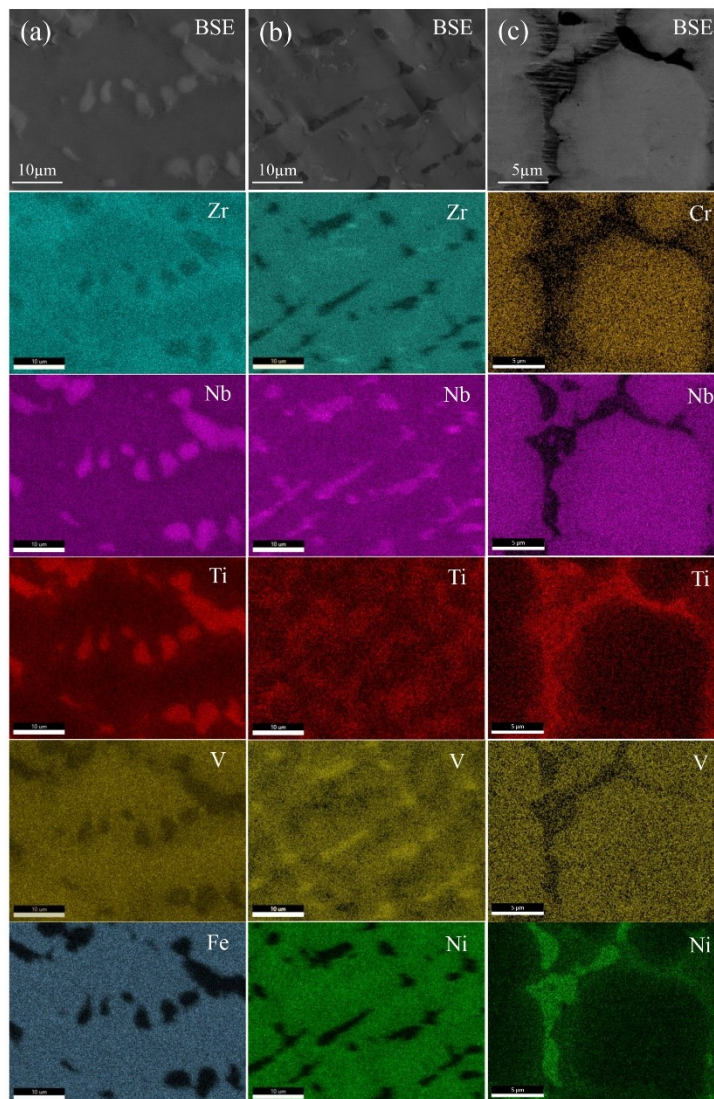

Figure S3 The BSE and corresponding EDS elemental mappings for the (a) TiVNbZrFe, (b) TiVNbZrNi and (c) TiVNbCrNi

## Reference

- 1 Zhang Y., Zhou Y. J., Lin J. P., Chen G. L. and Liaw P. K., *ADVANCED ENGINEERING MATERIALS*, 2008, **10**, 534-538.
- 2 Miracle D. B. and Senkov O. N., *Acta Materialia*, 2017, **122**, 448-511.
- 3 Guo S., Ng C., Lu J. and Liu C. T., *JOURNAL OF APPLIED PHYSICS*, 2011, **109**, 103505.
- 4 Mizutani U., Sato H., Inukai M., Nishino Y. and Zijlstra E. S., *Inorg Chem*, 2015, **54**, 930-46.
- 5 Mishra S. S., Yadav T. P., Srivastava O. N., Mukhopadhyay N. K. and Biswas K., *Journal of Alloys and Compounds*, 2020, **832**, 153764.
